# Supplementary material for: The economic burden of bronchiectasis – known and unknown: a systematic review
Source: BMC Pulm Med. 2019 Feb 28;19:54. doi: 10.1186/s12890-019-0818-6 (PMC6393984; doi:10.1186/s12890-019-0818-6)
Supplement: Supplementary file 2 — Sample of extraction grid. Grids for capturing the data extracted (PDF 50 kb) [file 12890_2019_818_MOESM2_ESM.pdf]

[illegible]

[illegible]

| atient)                                                                   |                                                                        |                                      |                                                                  |                                                                                                   |                                                                           |                                         |                               | Comment |
|---------------------------------------------------------------------------|------------------------------------------------------------------------|--------------------------------------|------------------------------------------------------------------|---------------------------------------------------------------------------------------------------|---------------------------------------------------------------------------|-----------------------------------------|-------------------------------|---------|
|                                                                           |                                                                        |                                      |                                                                  |                                                                                                   |                                                                           |                                         |                               |         |
| Frequency of specialists visits<br><i>(specify per month or per year)</i> | Frequency of hospitalization<br><i>(specify per month or per year)</i> | Length of hospitalization (mean, SD) | Frequency of ER visits<br><i>(specify per month or per year)</i> | Frequency of radiological examinations,<br>including CT<br><i>(specify per month or per year)</i> | Frequency of laboratory testing<br><i>(specify per month or per year)</i> | Drug dosage<br><i>(specify per day)</i> | Other resource<br>utilization |         |
|                                                                           |                                                                        |                                      |                                                                  |                                                                                                   |                                                                           |                                         |                               |         |
|                                                                           |                                                                        |                                      |                                                                  |                                                                                                   |                                                                           |                                         |                               |         |
